# Supplementary material for: The prevalence of adverse postnatal outcomes for mother and infant in the Netherlands
Source: PubMed Central journal article supplement (PMC6133278; doi:10.1371/journal.pone.0202960), 2018-09-11
Supplement: pone.0202960.s001.pdf [file pone.0202960.s001.pdf]

| Category                | Maternal and Setting complications                                                                    |              | Major                             | Observations |
|-------------------------|-------------------------------------------------------------------------------------------------------|--------------|-----------------------------------|--------------|
|                         | Non-major                                                                                             | Observations |                                   |              |
| <b>Brain</b>            | Suspicion of depression                                                                               | 5            | Suspicion of postpartum psychosis | 2            |
|                         | Severe psychological derailment (e.g. disorientated, not herself, no hallucinations and approachable) | 10           |                                   |              |
|                         | Insecurity, disproportionate emotional instability                                                    | 51           |                                   |              |
| <b>Breast</b>           | Suspicion of fungal infection                                                                         | 7            | Mastitis                          | 14           |
|                         | Other breast problem                                                                                  | 60           |                                   |              |
|                         | Fissures / pain / discomfort                                                                          | 97           |                                   |              |
| <b>Abdomen</b>          | Inflammation caesarean section wound                                                                  | 9            | Severe and persistent abdominal   | 9            |
|                         | Cystitis, bladder infection                                                                           | 40           |                                   |              |
|                         | Other abdomen problem                                                                                 | 42           |                                   |              |
| <b>Uterus</b>           | Fungal infection                                                                                      | 3            | Suspicion of endometritis         | 9            |
|                         | Inflammation stitches                                                                                 | 27           | Prolaps uterus or rectum          | 0            |
|                         | Severe hemorrhoids (persistent pressure, sleep interrupted)                                           | 17           |                                   |              |
|                         | Other uterus problem                                                                                  | 18           |                                   |              |
| <b>Pelvis</b>           | Pain / problems moving                                                                                | 48           |                                   |              |
| <b>Leg</b>              |                                                                                                       |              | Thrombosis / Flebitis             | 5            |
| <b>Bleeding</b>         |                                                                                                       |              | Postnatal hemorrhage              | 4            |
| <b>General</b>          | Cold sore                                                                                             | 10           |                                   |              |
|                         | Fever without other symptoms                                                                          | 3            |                                   |              |
|                         | Fever with other symptoms                                                                             | 17           |                                   |              |
| <b>Setting - Home</b>   | Disease other family member                                                                           | 8            |                                   |              |
|                         | Suspicion of unsafe environment mother                                                                | 1            |                                   |              |
|                         | Suspicion of unsafe environment baby                                                                  | 7            |                                   |              |
|                         | No appropriate physical place mother and / or baby                                                    | 4            |                                   |              |
| <b>Setting - Health</b> | Unknown non-medical risk (e.g. imminent loss of home)                                                 | 4            |                                   |              |
|                         | Unknown medical issue prior to conception                                                             | 0            |                                   |              |
|                         | Unknown use of medication                                                                             | 1            |                                   |              |
|                         | Unknown client being seen by general practitioner / specialist                                        | 1            |                                   |              |
|                         | Incorrect use of prescribed medication                                                                | 2            |                                   |              |
|                         | Failing to adhere to instructions (feeding, sleeping)                                                 | 6            |                                   |              |
|                         | Home birth and/or not seeking specialist care in case of severe risk or birth at <37 weeks            | 1            |                                   |              |
|                         | Severe communication problem / miscommunication with other maternity specialists                      | 5            |                                   |              |
|                         | Severe communication problem with client                                                              | 2            |                                   |              |
