# Supplementary material for: The prevalence of adverse postnatal outcomes for mother and infant in the Netherlands
Source: PubMed Central journal article supplement (PMC6133278; doi:10.1371/journal.pone.0202960), 2018-09-11
Supplement: pone.0202960.s002.pdf [file pone.0202960.s002.pdf]

| Category                                              | Neonatal complications                                                                            |                                                        |                                      |                                      |
|-------------------------------------------------------|---------------------------------------------------------------------------------------------------|--------------------------------------------------------|--------------------------------------|--------------------------------------|
|                                                       | Non-major                                                                                         | Number of observations                                 | Major                                | Number of observations               |
| <b>Digestion</b>                                      | Weight loss (>10% of birth weight; less in case of low birth weight or gestational age <37 weeks) | 121                                                    |                                      |                                      |
|                                                       | Suspicion of malnutrition                                                                         | 16                                                     |                                      |                                      |
|                                                       | Nausea / vomiting (persistent between feedings)                                                   | 21                                                     |                                      |                                      |
|                                                       | Thrush                                                                                            | 13                                                     |                                      |                                      |
|                                                       | Problems swallowing / choking                                                                     | 8                                                      |                                      |                                      |
|                                                       | Other                                                                                             | 54                                                     |                                      |                                      |
|                                                       | Problems initiating breastfeeding                                                                 | 68                                                     |                                      |                                      |
|                                                       | Tied tongue                                                                                       | 34                                                     |                                      |                                      |
|                                                       | Consult lactation specialist                                                                      | 65                                                     |                                      |                                      |
|                                                       | <b>Birth Trauma</b>                                                                               | Suspicion of fracture (not seen by other professional) | 4                                    | Suspicion of cleft lip and/or palate |
| Suspicion of pareses (not seen by other professional) |                                                                                                   | 0                                                      |                                      |                                      |
| Suspicion of other birth trauma and/or -defect        |                                                                                                   | 9                                                      |                                      |                                      |
| Cephalic hematoma                                     |                                                                                                   | 9                                                      |                                      |                                      |
| <b>Skin</b>                                           | Relevant rash                                                                                     | 12                                                     | Cyanosis                             | 3                                    |
|                                                       | Icterus                                                                                           | 109                                                    |                                      |                                      |
|                                                       | Other skin problem and/or -defect                                                                 | 32                                                     |                                      |                                      |
| <b>Suspicion of domestic violence</b>                 | Negligence                                                                                        | 2                                                      | Burns                                | 0                                    |
|                                                       |                                                                                                   |                                                        | Bruising or other injury             | 0                                    |
| <b>General</b>                                        | Fever without other symptoms                                                                      | 4                                                      | Limp / drowsy / bad condition        | 5                                    |
|                                                       | Fever with other symptoms                                                                         | 1                                                      | Tight chest                          | 3                                    |
|                                                       | Moaning                                                                                           | 6                                                      | Respiratory assistance / reanimation | 2                                    |
|                                                       | Extrem crying behaviour                                                                           | 5                                                      |                                      |                                      |
|                                                       | Streptococcus                                                                                     | 3                                                      |                                      |                                      |
|                                                       | Low temperature                                                                                   | 48                                                     |                                      |                                      |
